# Supplementary material for: Biomass based nitrogen-doped structure-tunable versatile porous carbon materials
Source: Royal Society of Chemistry journal article supplement (doi:10.1039/c7ta02113e), 2017-01-01
Supplement: c7ta02113e1.pdf [file c7ta02113e1.pdf]

**SUPPORTING INFORMATION**

**FOR**

**Biomass based nitrogen-doped structure-tunable  
versatile porous carbon material**

*Xin Zhou,<sup>a,b</sup> Penglei Wang,<sup>a,b</sup> Yagang Zhang,<sup>\*a,b,c</sup> Lulu Wang,<sup>a,b</sup> Letao Zhang,<sup>a</sup>*

*Lan Zhang,<sup>a,b</sup> Lu Xu,<sup>a,b</sup> and Li Liu<sup>a</sup>*

<sup>a</sup> Center for Green Chemistry and Organic Functional Materials Laboratory, Xinjiang Technical Institute of Physics and Chemistry, The Chinese Academy of Sciences, Urumqi 830011, China

<sup>b</sup> University of the Chinese Academy of Sciences, Beijing 100049, China

<sup>c</sup> Department of Chemical & Environmental Engineering, Xinjiang Institute of Engineering, Urumqi 830023, China

\*Corresponding author: Prof. Yagang Zhang

Tel: +86-18129307169; Fax: +86-991-3838957; E-mail: ygzhang@ms.xjb.ac.cn

**Table of Contents**

|                                                                                                                                                    |           |
|----------------------------------------------------------------------------------------------------------------------------------------------------|-----------|
| <b>Chemical structure of CC.....</b>                                                                                                               | <b>S3</b> |
| <b>Chemical structure of MB.....</b>                                                                                                               | <b>S3</b> |
| <b>Bulk HNPCs in different shapes.....</b>                                                                                                         | <b>S3</b> |
| <b>X-ray diffraction patterns of the Na<sub>2</sub>CO<sub>3</sub> for HNPCs.....</b>                                                               | <b>S4</b> |
| <b>Nitrogen adsorption/desorption isotherm and pore size distribution of CC-900.....</b>                                                           | <b>S4</b> |
| <b>XRD pattern of CC-900.....</b>                                                                                                                  | <b>S5</b> |
| <b>XPS survey spectra and the high-resolution N 1s spectra of CC-900.....</b>                                                                      | <b>S5</b> |
| <b>Nitrogen element with different states on the surface of HNPCs.....</b>                                                                         | <b>S6</b> |
| <b>The rate capability and cycling stability of HNPCs-900.....</b>                                                                                 | <b>S6</b> |
| <b>Comparison of gravimetric capacitances at different current density in a<br/>three electrode cell with 6 M KOH solution as electrolyte.....</b> | <b>S7</b> |
| <b>Electrochemical performance of the HNPCs-900 material in 1 M H<sub>2</sub>SO<sub>4</sub>.....</b>                                               | <b>S7</b> |
| <b>Nyquist plots of HNPCs-900 in acidic and basic medium.....</b>                                                                                  | <b>S8</b> |
| <b>Static contact angle with basic and acidic electrolytes on HNPCs-900 electrode.....</b>                                                         | <b>S8</b> |
| <b>Photographs of electrolyte droplets on the surface of HNPCs-900 electrode.....</b>                                                              | <b>S8</b> |
| <b>Equilibrium adsorption isotherms of MB on CC-900.....</b>                                                                                       | <b>S9</b> |

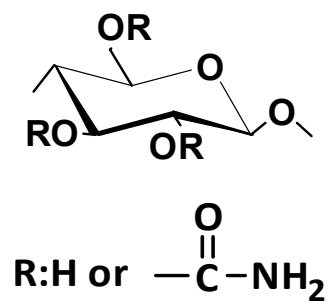

**Fig. S1** Chemical structure of cellulose carbamate (CC) as precursor for the preparation of HNPCs.

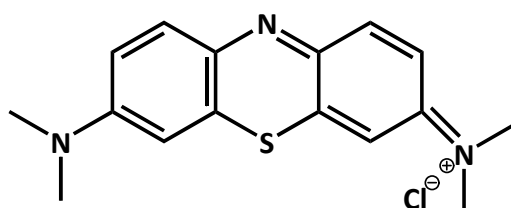

**Fig. S2** Chemical structure of methylene blue (MB) as model organic dye compound.

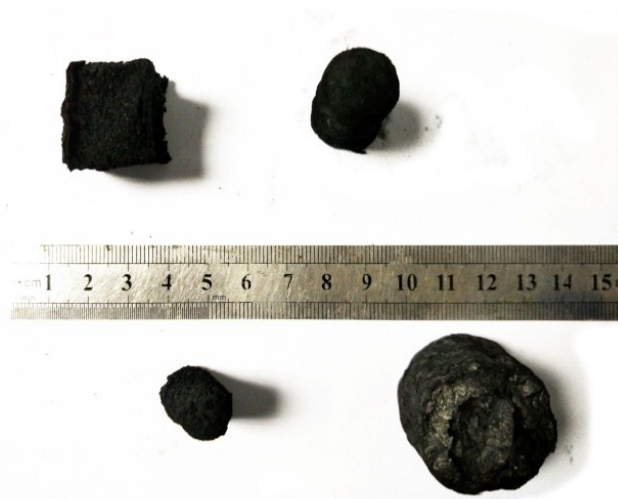

**Fig. S3** Bulk Nitrogen-doped porous carbons (HNPCs) in different shapes.

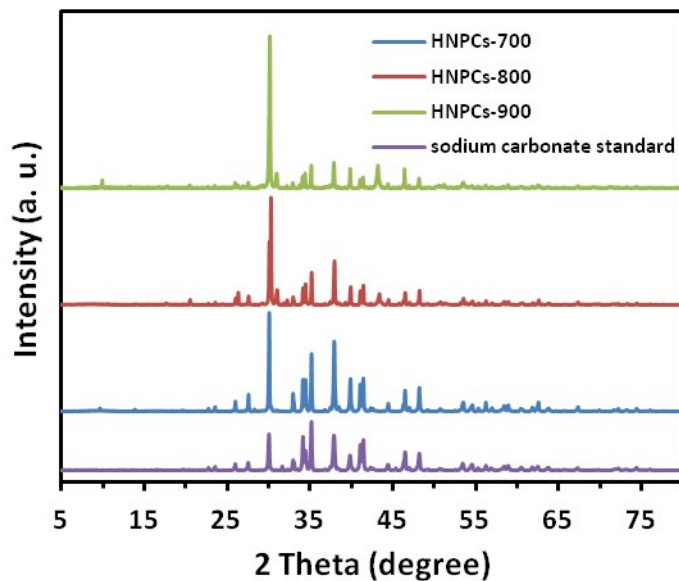

**Fig. S4** X-ray diffraction patterns of  $\text{Na}_2\text{CO}_3$  standard and  $\text{Na}_2\text{CO}_3$  obtained from washing procedure in preparing Nitrogen-doped porous carbons (HNPCs) at different temperature.

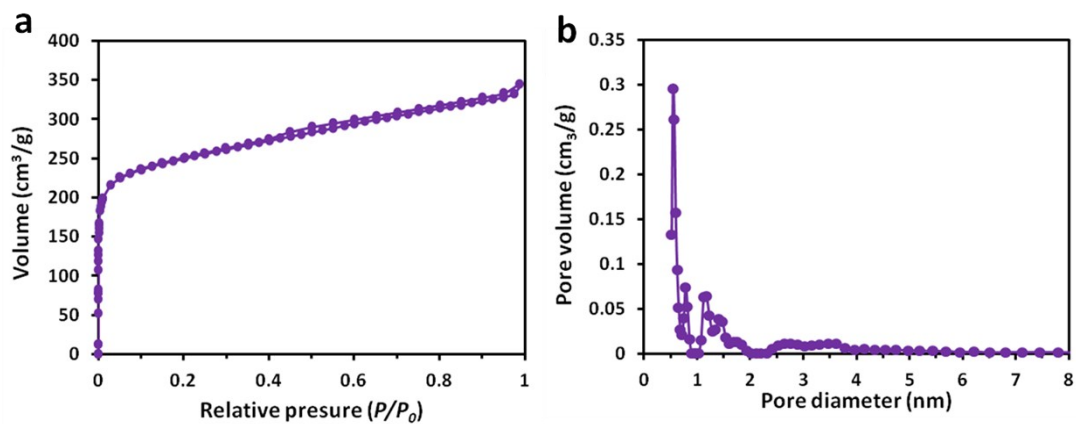

**Fig. S5** (a) Nitrogen adsorption/desorption isotherm and (b) corresponding pore size distribution of CC-900.

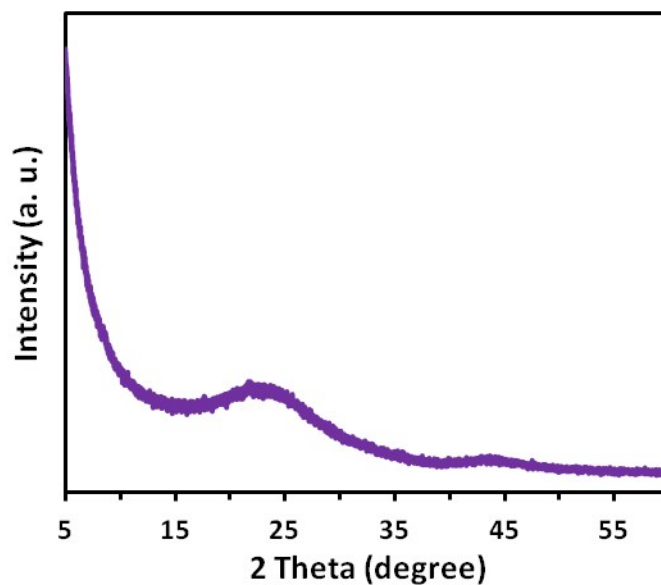

Fig. S6 XRD pattern of CC-900.

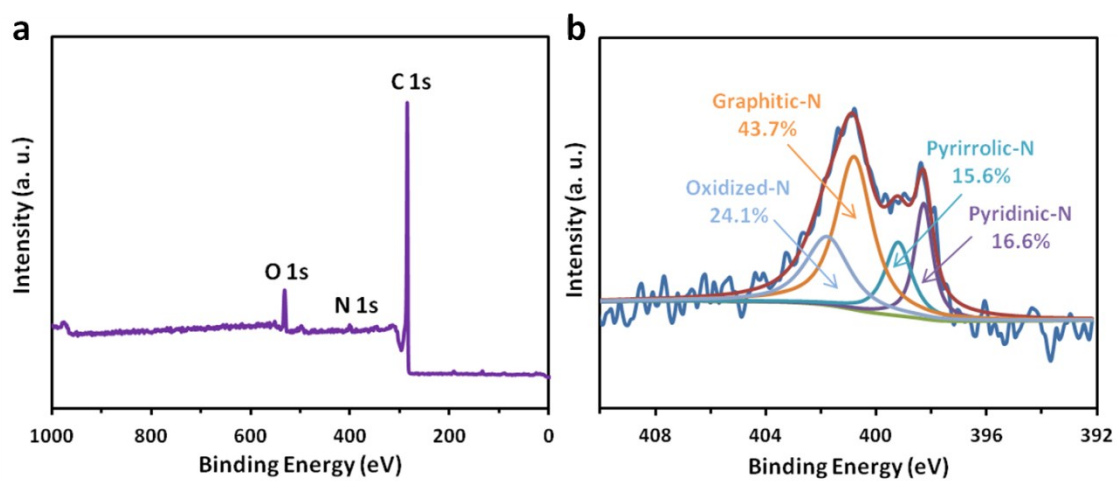

Fig. S7 (a) XPS Survey spectra and (b) the High-resolution N 1s spectra of CC-900.

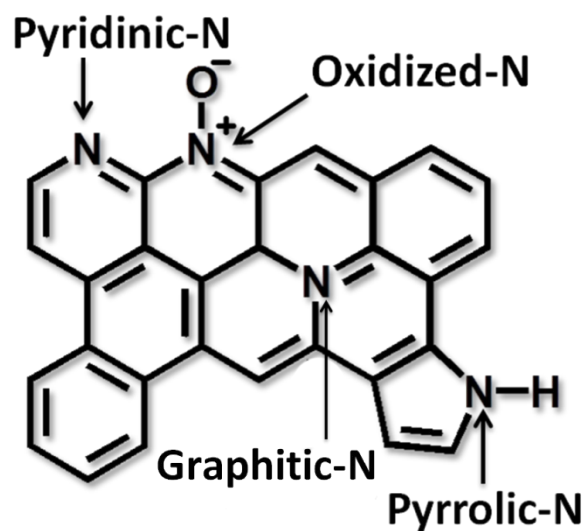

**Fig. S8** Illustration of nitrogen element with different chemical states on the surface of nitrogen-doped porous carbons.

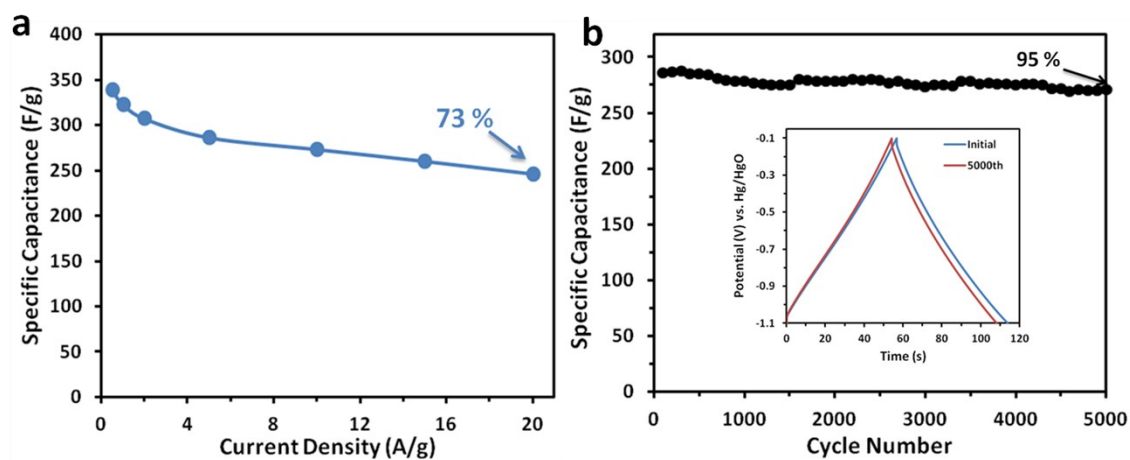

**Fig. S9** (a) Variation of specific capacitance with increasing current densities for HNPCs-900. (b) Specific capacitance of HNPCs-900 for 5000 cycles charge/discharge test at current density of 5 A/g (Insert exhibits initial and 5,000th GCD curves).

**Table S1.** Comparison of gravimetric capacitances of nitrogen-doped porous carbon materials at various current densities in a three-electrode cell with 6 M KOH solution as electrolyte.

| Entry | Materials                                 | SBET (m <sup>2</sup> /g) | N %  | C <sub>g</sub> (F/g) at different current density (A/g) |     |     |     | Ref.             |
|-------|-------------------------------------------|--------------------------|------|---------------------------------------------------------|-----|-----|-----|------------------|
|       |                                           |                          |      | 0.5                                                     | 1   | 5   | 10  |                  |
| 1     | Boron and nitrogen co-doped porous carbon | 376                      | 0.53 | 247                                                     | 155 | 150 | 135 | 15               |
| 2     | N-doped activated carbon sheets           | 1998                     | 3.06 | 312                                                     | 300 | 260 | 250 | 25               |
| 3     | Porous nitrogen-doped carbon nanotubes    | 1765                     | 4.56 | 210                                                     | 174 | --  | 130 | 52               |
| 4     | 3D nitrogen-doped porous carbon           | 1470                     | 8.20 | 296                                                     | 250 | 190 | 180 | 53               |
| 5     | Nitrogen-doped porous graphitic carbon    | 1027                     | 7.72 | --                                                      | 293 | 260 | 235 | 54               |
| 6     | Nitrogen-doped mesoporous carbons         | 653                      | 3.9  | 213                                                     | 195 | 165 | --  | 55               |
| 7     | HNPCs-900                                 | 3700                     | 7.70 | 339                                                     | 323 | 286 | 273 | <b>This work</b> |

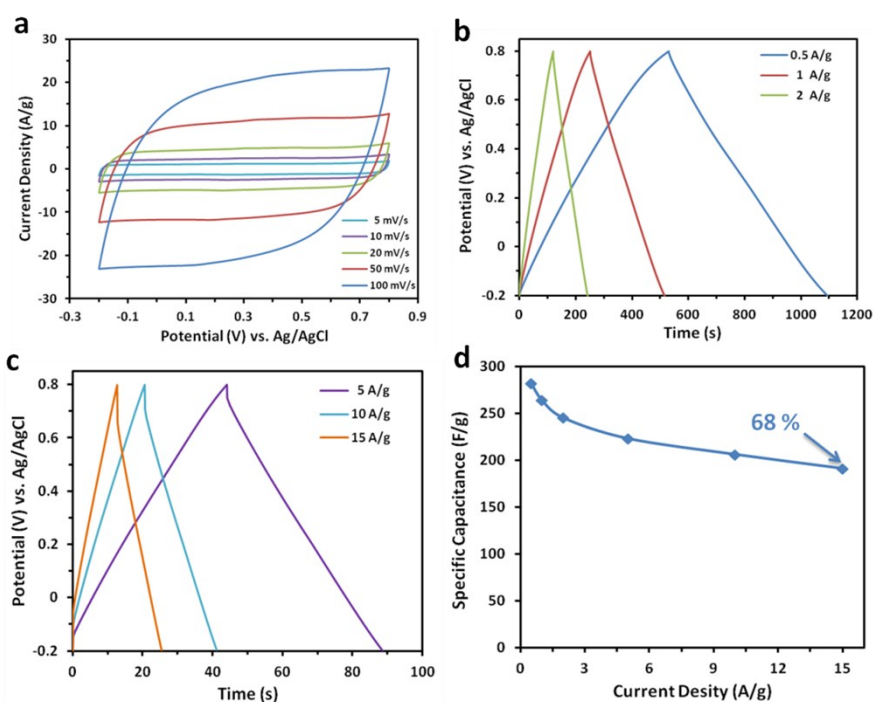

**Fig. S10** Electrochemical performance of the HNPCs-900 in a three-electrode cell with 1 M H<sub>2</sub>SO<sub>4</sub> as electrolyte. (a) CV curves at various scan rate. (b), (c) GCD profiles tested at 0.5-15 A/g. (d) Variation of specific capacitance with increasing current densities.

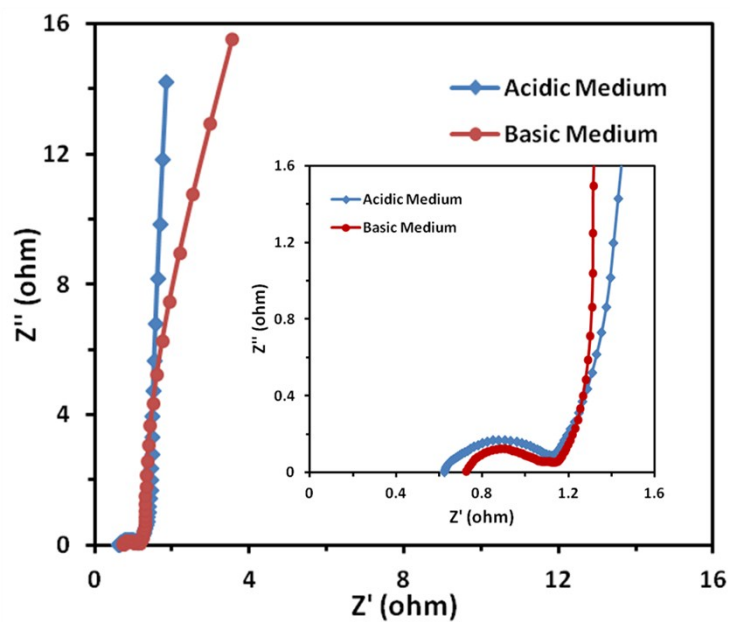

**Fig. S11** Nyquist plots of HNPCs-900 in basic and acidic medium, 6 M KOH (red line) and 1 M H<sub>2</sub>SO<sub>4</sub> (blue line) and (Inset shows locally enlarged Nyquist plots in high frequency region).

**Table S2.** Static contact angle with basic and acidic electrolytes on HNPCs-900 electrode.

| Electrolyte                       | Contact angle (°) |
|-----------------------------------|-------------------|
| 6 M KOH                           | 28.9 ± 3.5        |
| 1M H <sub>2</sub> SO <sub>4</sub> | 33.0 ± 4.2        |

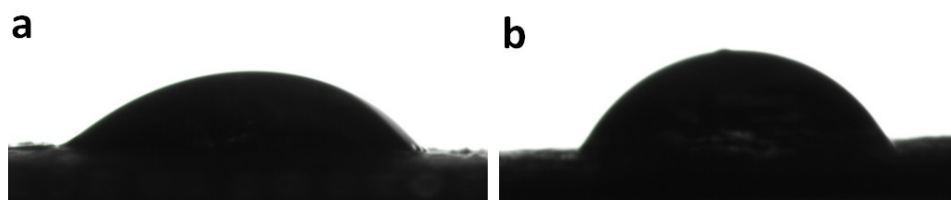

**Fig. S12** Photographs of (a) basic medium and (b) acidic medium droplets on the surface of HNPCs-900 electrode.



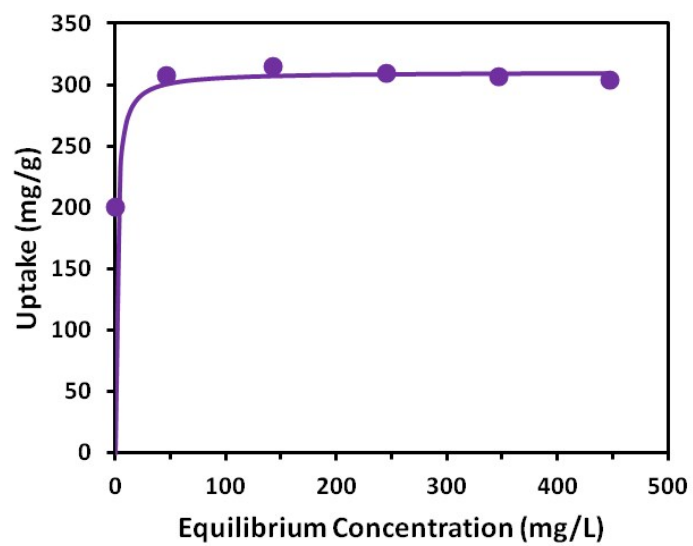

**Fig. S13** Equilibrium adsorption isotherms of MB on CC-900 (experimental conditions: 5.0 mg of HNPCs was added in 10 mL MB solution at a designated concentration after stirring for 3 h. MB initial concentration ( $C_0$ ) = 100-600 mg/L, the CC-900 concentration = 0.5 g/L).
